# Supplementary material for: Contribution of marine biological emissions to gaseous methylamines in the atmosphere: an emission inventory based on satellite data
Source: Copernicus journal article supplement (doi:10.5194/acp-2022-394), 2022-07-04
Supplement: Supplementary file 1 [file acp-2022-394-supplement.pdf]

1 **Contribution of marine biological emissions to gaseous**  
2 **methylamines in the atmosphere: an emission inventory**  
3 **based on satellite data**

4 Qi Zhang<sup>2</sup>, Shiguo Jia<sup>1, 4</sup>, Weihua, Chen<sup>3</sup>, Jingying Mao<sup>8</sup>, Liming Yang<sup>5</sup>, Padmaja Krishnan<sup>6</sup>,  
5 Sayantan Sarkar<sup>7</sup>, Min Shao<sup>3</sup>, Xuemei Wang<sup>3</sup>

6 <sup>1</sup> School of Atmospheric Sciences, Sun Yat-sen University and Southern Marine Science and  
7 Engineering Guangdong Laboratory (Zhuhai), Zhuhai, 519082, China

8 <sup>2</sup> Tianjin Air Pollution Control Laboratory, Tianjin Academy of Eco-Environmental Sciences, Tianjin,  
9 300191, PR China

10 <sup>3</sup> Guangdong-Hongkong-Macau Joint Laboratory of Collaborative Innovation for Environmental  
11 Quality, Institute for Environmental and Climate Research, Jinan University, Guangzhou, 510632,  
12 China

13 <sup>4</sup> Guangdong Provincial Field Observation and Research Station for Climate Environment and Air  
14 Quality Change in the Pearl River Estuary, Guangzhou, 510275, China

15 <sup>5</sup> Department of Chemical and Biomolecular Engineering, National University of Singapore, Singapore,  
16 117576, Singapore

17 <sup>6</sup> Division of Engineering, New York University Abu Dhabi, Abu Dhabi, P.O. Box 129188, United  
18 Arab Emirates

19 <sup>7</sup> School of Engineering, Indian Institute of Technology (IIT) Mandi, Kamand,  
20 Himachal Pradesh 175075, India

21 <sup>8</sup> Scientific Research Academy of Guangxi Environmental Protection, Nanning, 530022, China

22 *Correspondence to:* Xuemei Wang (eciwxm@jnu.edu.cn), Shiguo Jia (jiashg3@mail.sysu.edu.cn)

23

24

25

26

27

28

29

30

31

Supplementary Information

32

Contains 12 pages, 3 tables, 8 figures

33 In this study, Bias, MAE (Mean Absolute Error), and R (Correlation coefficient) were used to evaluate  
34 the deviation between observed value and simulated value.

35 The January and April observations are from the China Meteorological Data Network  
36 (<http://data.cma.cn>), which includes 659 meteorological stations in 28 provincial-level administrative  
37 regions in eastern China (excluding Beijing, Xinjiang and Tibet). The July and October observations  
38 are from NCDC (National Climatic Data Center, <ftp://ftp.ncdc.noaa.gov/pub/data/noaa/isd-lite/>).  
39 Contains 396 sites within the simulation range.

40 Table S1 Comparison of meteorological element model simulation results and observations

|                                    |      | Observation | Simulation | Bias   | MAE   | R    |
|------------------------------------|------|-------------|------------|--------|-------|------|
| Wind Speed (m<br>s <sup>-1</sup> ) | Jan. | 4.00        | 4.11       | 0.11   | 3.91  | 0.68 |
|                                    | Apr. | 4.21        | 4.56       | 0.35   | 3.41  | 0.68 |
|                                    | Jun. | 2.50        | 3.70       | 1.20   | 1.60  | 0.39 |
|                                    | Oct. | 2.40        | 3.70       | 1.30   | 1.60  | 0.57 |
| Temperature<br>(°C)                | Jan. | 2.50        | 1.63       | -0.86  | 1.48  | 0.89 |
|                                    | Apr. | 13.24       | 11.39      | -1.85  | 2.46  | 0.81 |
|                                    | Jun. | 24.50       | 23.40      | -1.10  | 2.20  | 0.89 |
| Relative<br>Humidity (%)           | Oct. | 14.50       | 13.20      | -1.30  | 2.20  | 0.92 |
|                                    | Jan. | 71.64       | 59.71      | -11.93 | 18.34 | 0.73 |
|                                    | Apr. | 63.19       | 61.18      | -2.01  | 12.07 | 0.84 |

41 Table S2 Ratio of various types of emission sources in January, April, July and October.

|                | Jan. |      |      | Apr. |      |      | Jul. |      |      | Oct. |      |      |
|----------------|------|------|------|------|------|------|------|------|------|------|------|------|
|                | MMA  | DMA  | TMA  |
| Agricultural   | 86.8 | 60.2 | 84.8 | 93.2 | 82.6 | 92.9 | 94.6 | 86.2 | 94.4 | 91.5 | 78.9 | 91.1 |
| Industrial     | 4.8  | 2.9  | 4.0  | 4.1  | 3.2  | 3.5  | 3.2  | 2.6  | 2.7  | 5.1  | 3.8  | 4.3  |
| Power Plant    | 0    | 0    | 0    | 0    | 0    | 0    | 0    | 0    | 0    | 0    | 0    | 0    |
| Residential    | 7.9  | 36.5 | 10.8 | 2.4  | 14.0 | 3.3  | 1.8  | 11.0 | 2.5  | 3.0  | 17.0 | 4.1  |
| Transportation | 0.5  | 0.2  | 0.5  | 0.4  | 0.2  | 0.4  | 0.3  | 0.2  | 0.3  | 0.5  | 0.3  | 0.5  |

42

43 Table S3 Changes in amine emission fluxes (Unit: %).

|           |     | Jan. | Apr. | Jul. | Oct. |
|-----------|-----|------|------|------|------|
| Reduce    | MMA | 12.9 | 8.3  | 4.4  | 7.2  |
| 50% Chla. | TMA | 2.6  | 3.8  | 2.6  | 2.9  |
| Increase  | MMA | -8.6 | -6.6 | -4.4 | -7.2 |
| 50% Chla. | TMA | -2.4 | -3.4 | -2.1 | -2.5 |

44

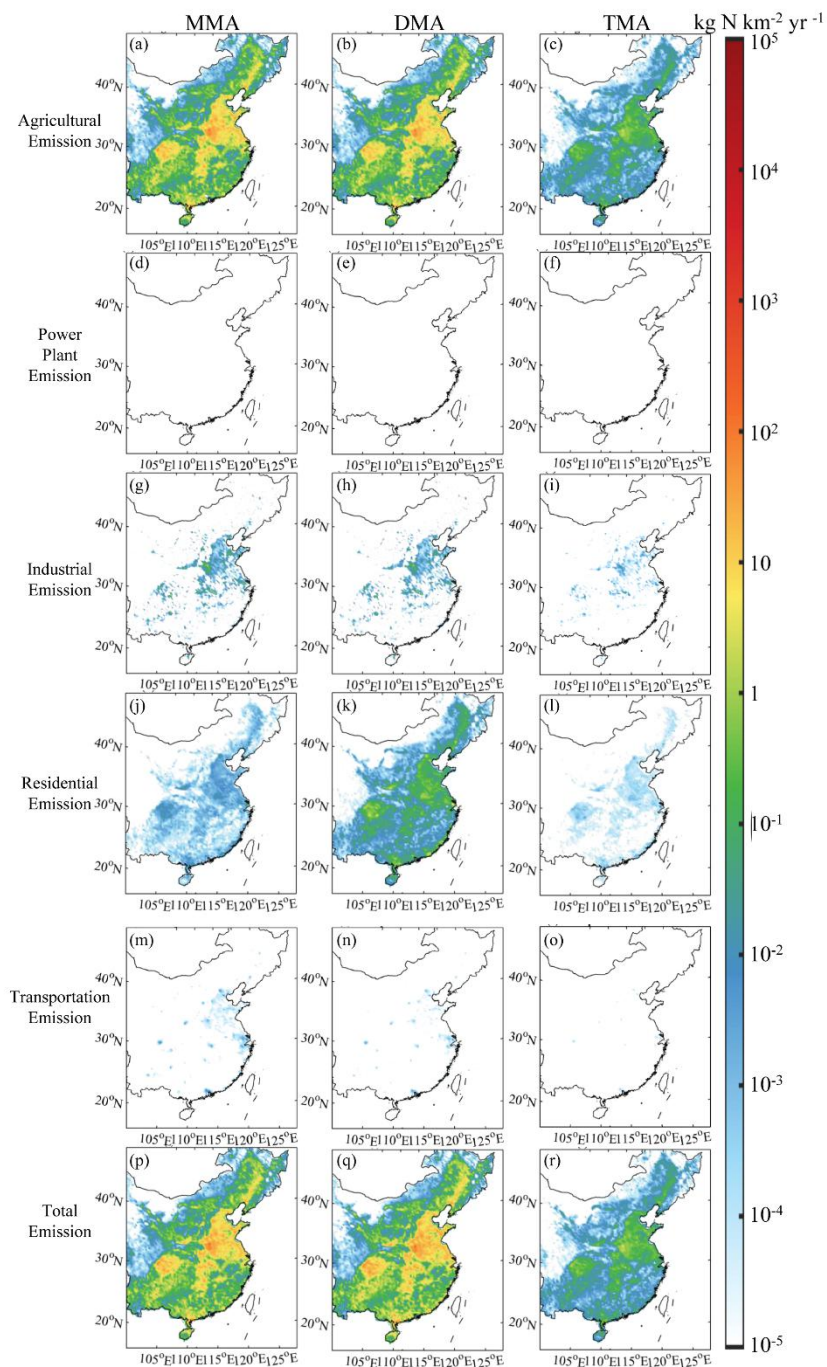

45

46 Figure S1: Spatial distribution of amines emission fluxes: (a, b, c) Agricultural emissions; (d, e, f)

47 Power plant emissions; (g, h, i) Industrial emissions; (j, k, l) Residential emissions; (m, n, o)

48 Transportation emissions; (p, q, r) Total.

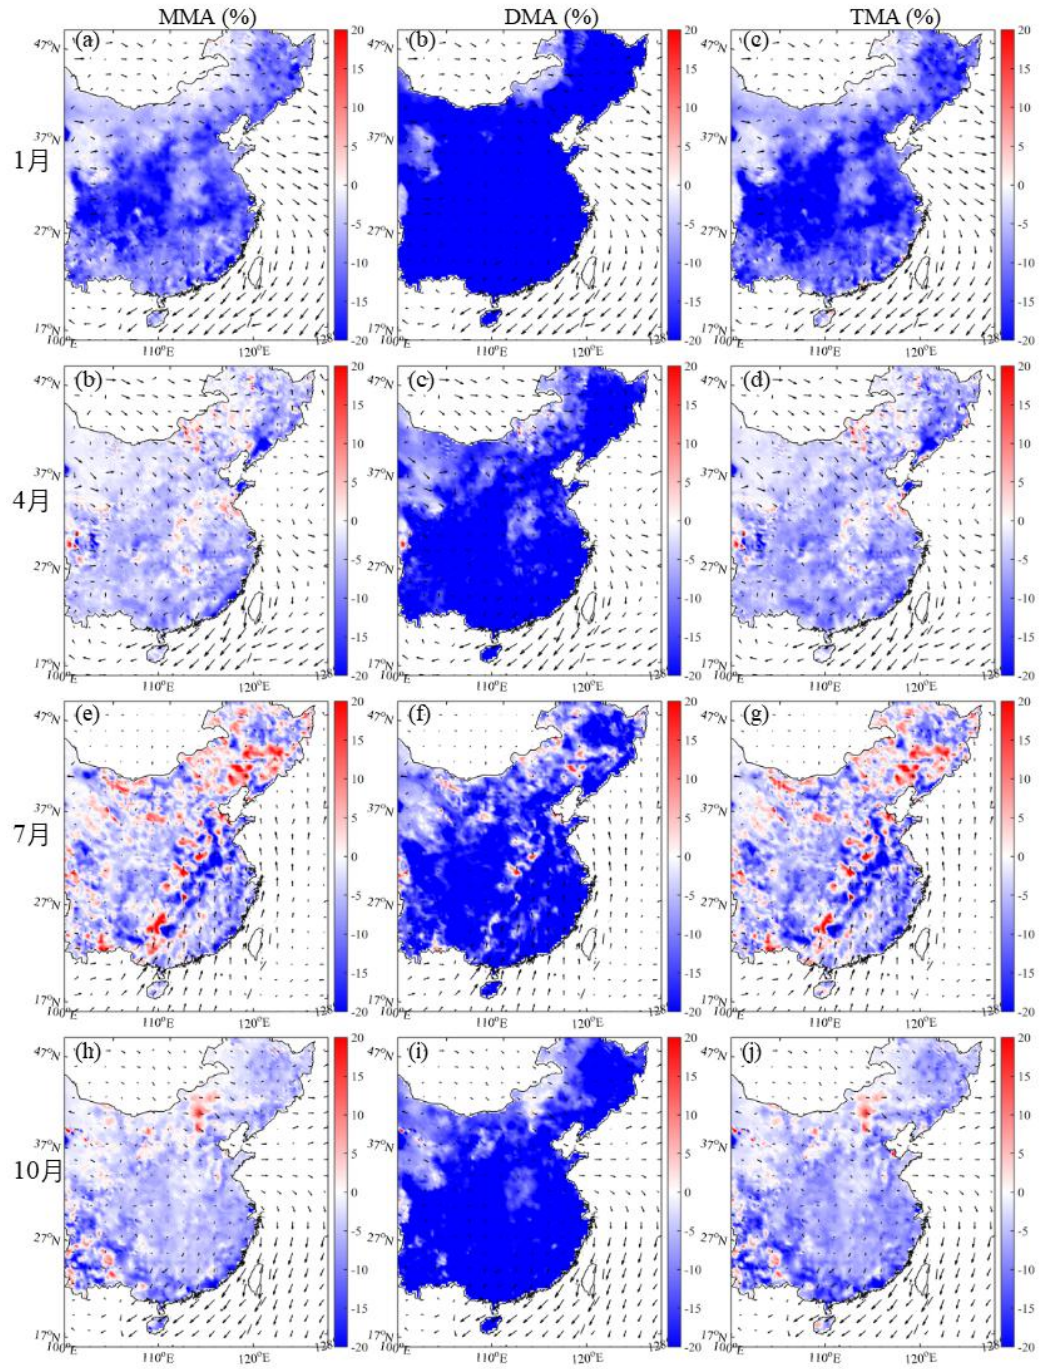

49

50 Figure S2: Changes in amine simulated concentration after reduction of residential emissions.

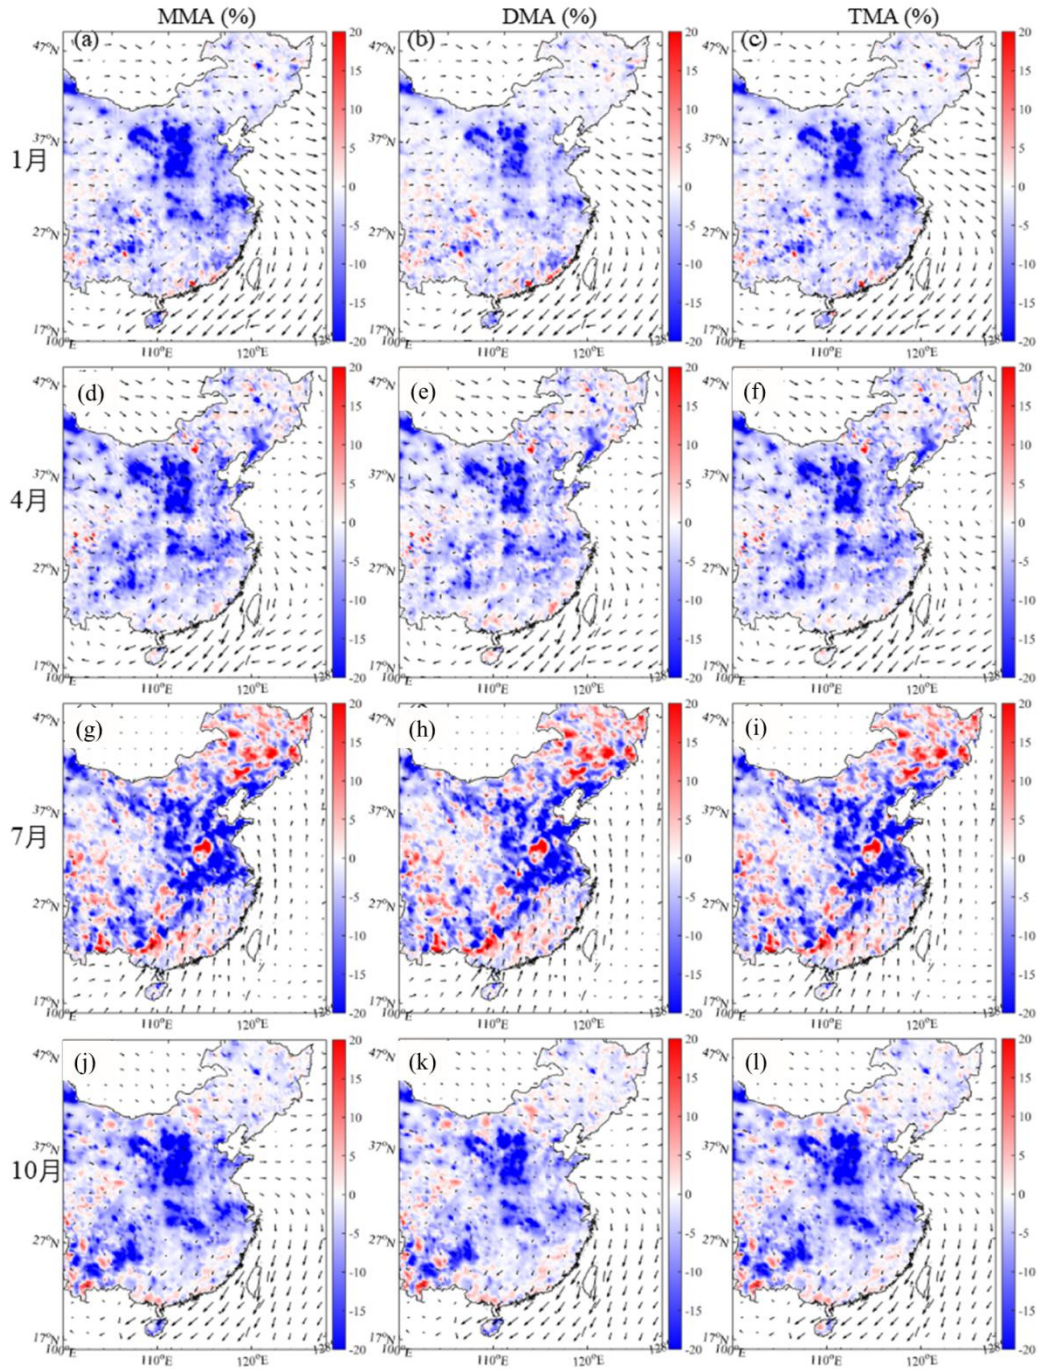

51

52 Figure S3: Changes in amine simulated concentration after reduction of industrial emissions.

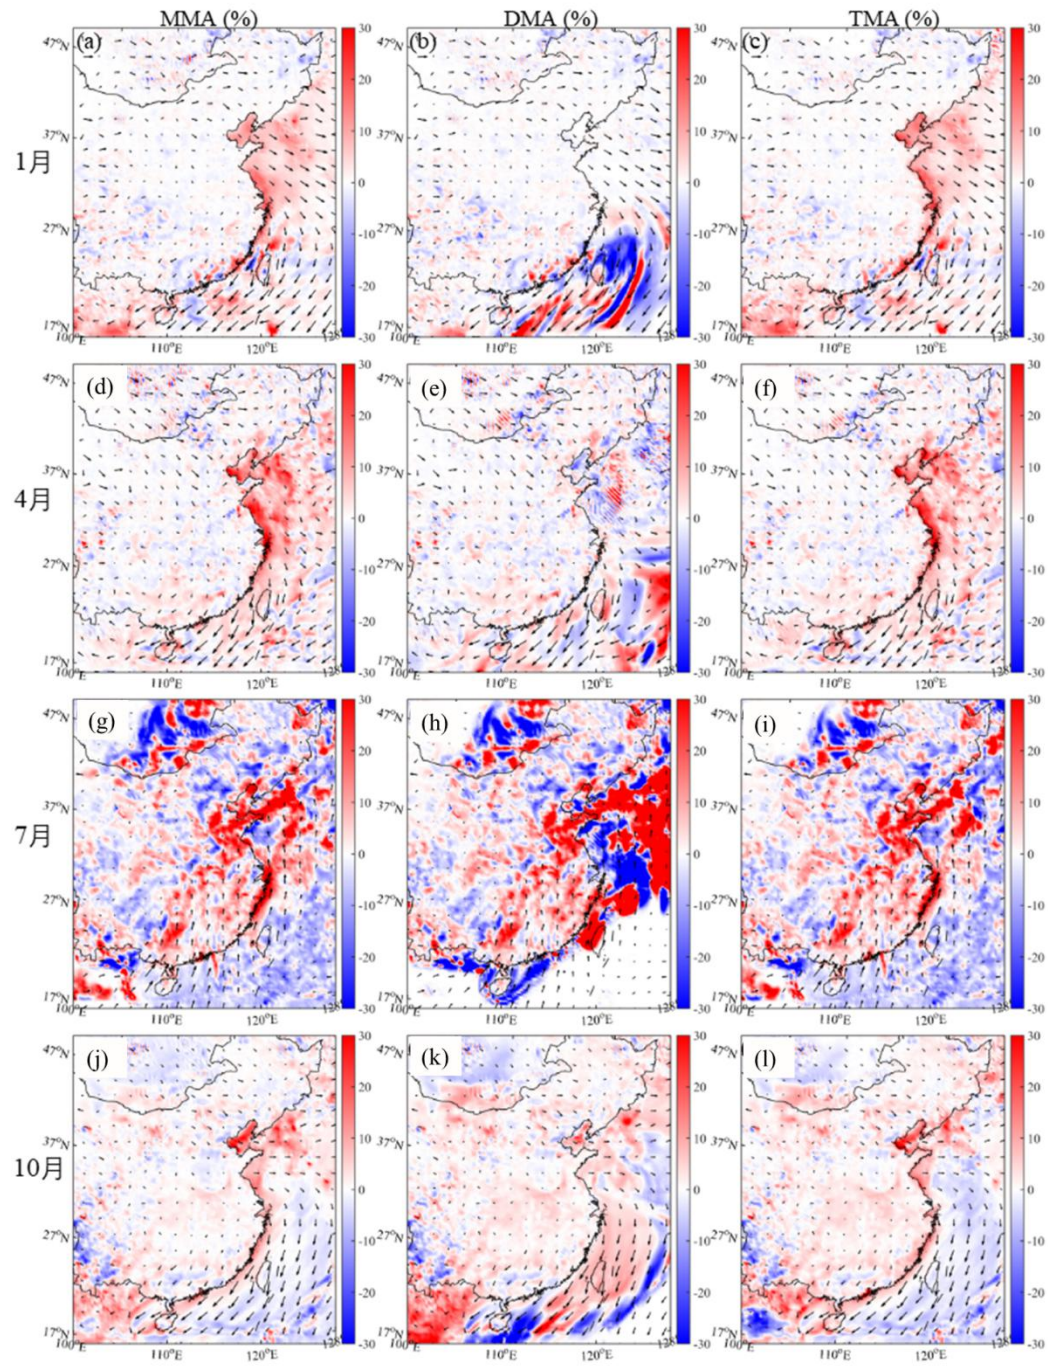

53

54 Figure S4: Changes in amine simulated concentrations after a 50% reduction in Chla.



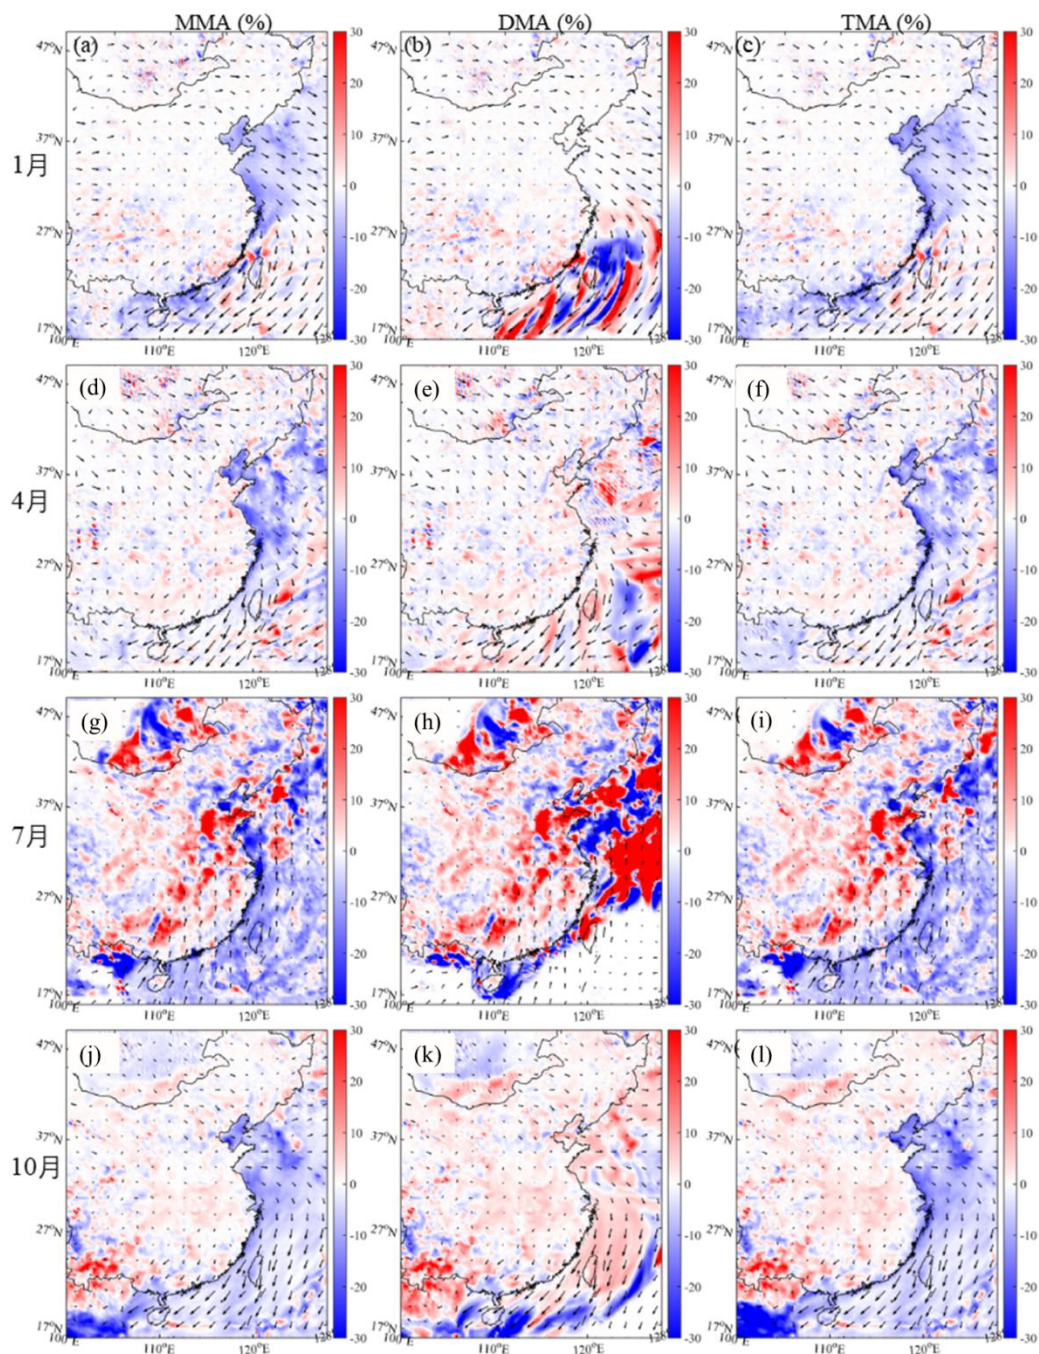

55

56 Figure S5: Changes in amine simulated concentrations after a 50% increase in Chla.

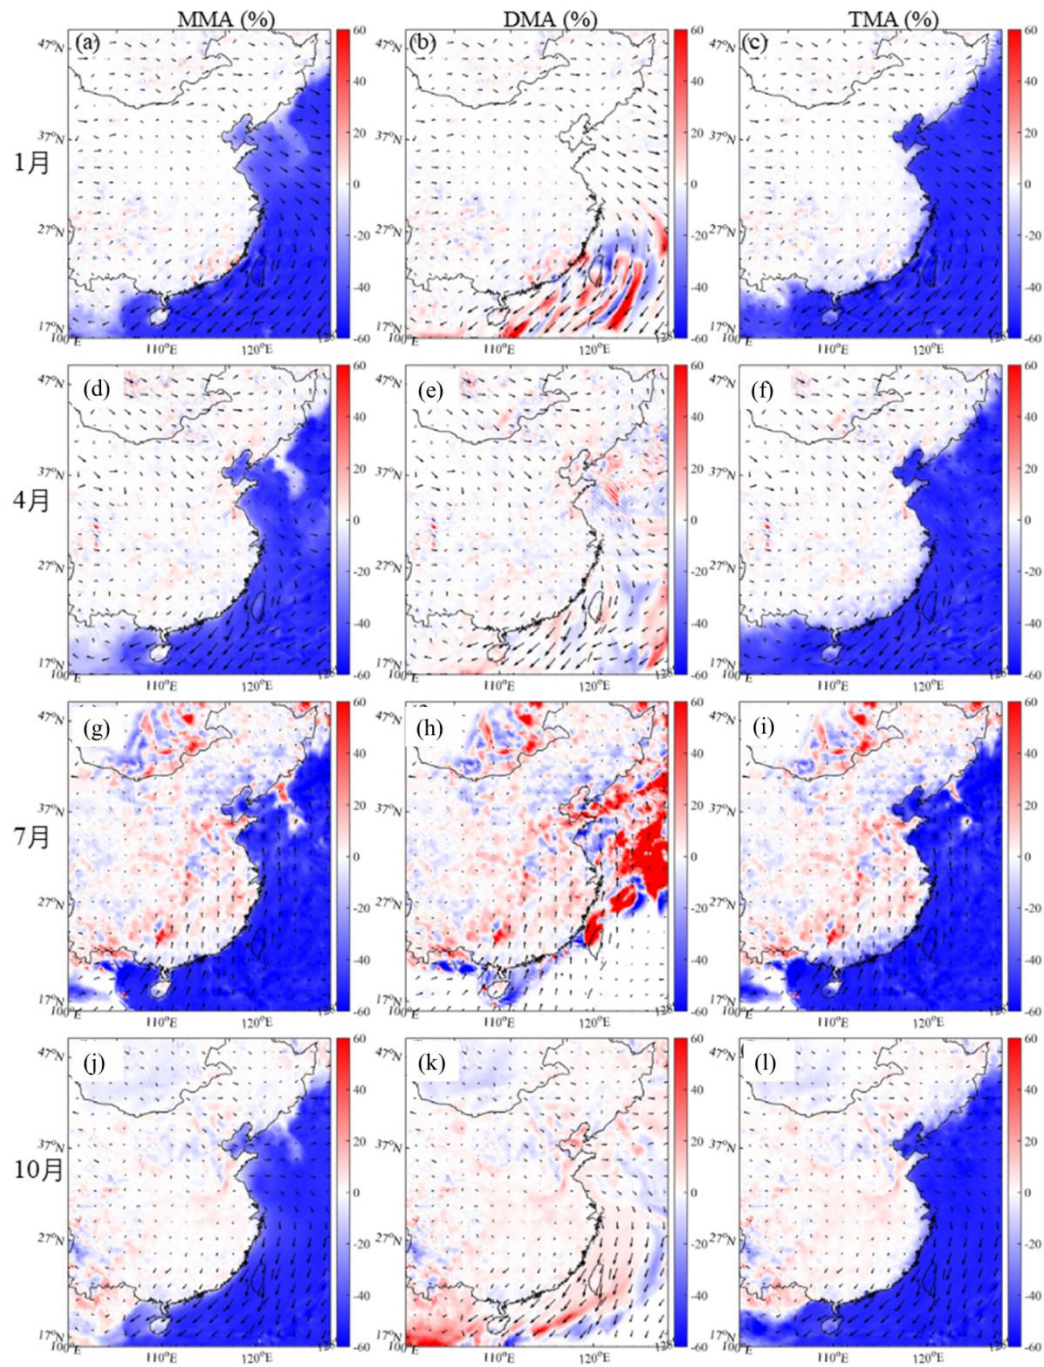

57

58 Figure S6: Changes in amine simulated concentrations after a 50% reduction in WS.

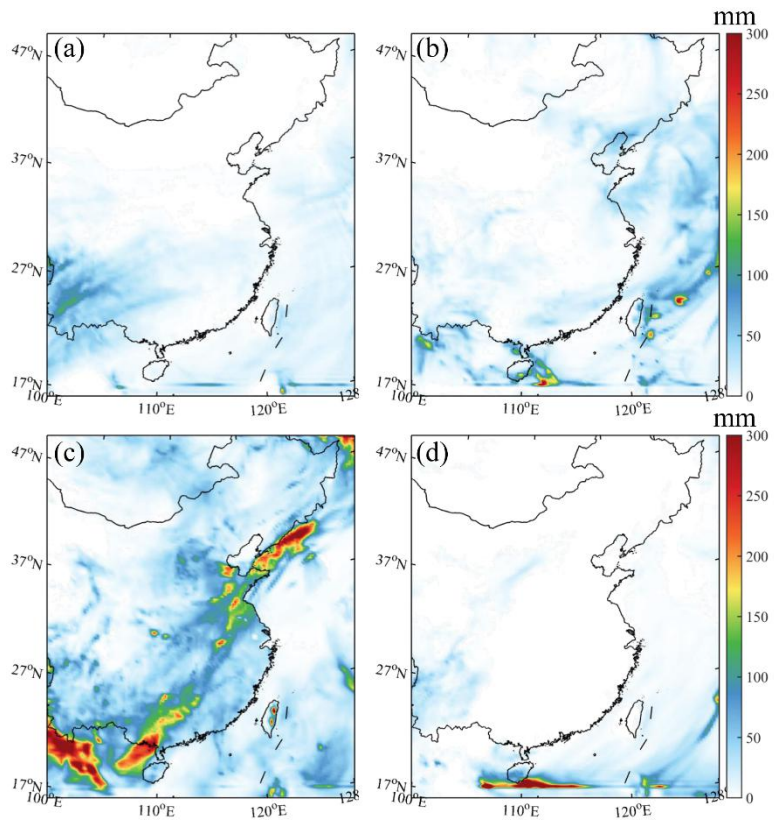

59

60 Figure S7: Simulated accumulated rainfall distribution in the simulated period: (a) January, (b) April,  
 61 (c) July and (d) October.

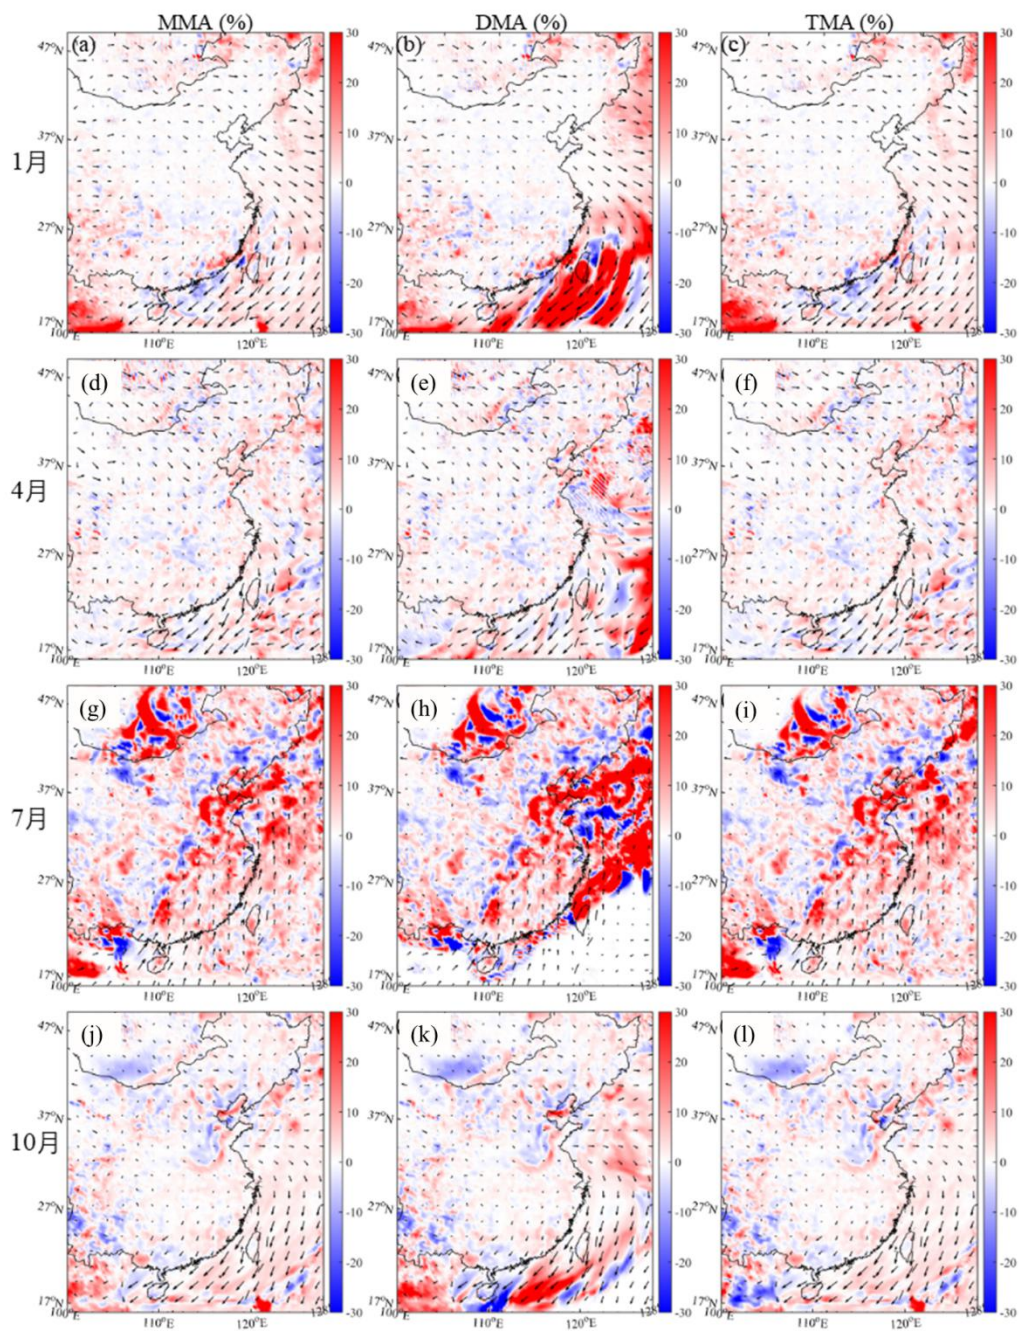

62

63 Figure S8: Changes in amine simulated concentration after decreasing the apparent Henry coefficient.
